# Supplementary material for: Tailoring the amphiphilicity and self-assembly of thermosensitive polymers: end-capped PEG–PNIPAAM block copolymers
Source: Royal Society of Chemistry journal article supplement (doi:10.1039/c3sm51945g), 2013-09-05
Supplement: c3sm51945g.pdf [file c3sm51945g.pdf]

## Electronic supplementary materials

### Tailoring the Amphiphilicity and Self-assembly of Thermosensitive Polymers: End-capped PEG-PNIPAAm Block Copolymers

Zhilong Quan<sup>1,2</sup>, Kaizheng Zhu<sup>2</sup>, Kenneth D. Knudsen<sup>3</sup>, Bo Nyström<sup>2</sup> and Reidar Lund<sup>2\*</sup>

<sup>1</sup> College of Materials Science & Engineering, Huaqian University, 361021 Xiamen, P.R.China.

<sup>2</sup> Department of Chemistry, University of Oslo, P.O.Box 1033, Blindern, N-0315 Oslo, Norway.

<sup>3</sup>Department of Physics, Institute for Energy Technology, P. O. Box 40, N-2027 Kjeller, Norway.

\* To whom correspondence should be addressed: reidar.lund@kjemi.uio.no

**Figure S1** Synthesis of C<sub>18</sub>-Br and C<sub>18</sub>-PEG-Br initiator

**Figure S2** <sup>1</sup>H NMR spectrum of C<sub>18</sub>-Br in CDCl<sub>3</sub>

**Figure S3** <sup>13</sup>C NMR spectrum of C<sub>18</sub>-Br in CDCl<sub>3</sub>

**Figure S4** <sup>1</sup>H NMR spectrum of C<sub>18</sub>-PEG<sub>10</sub>-Br in CDCl<sub>3</sub>

**Figure S5** <sup>13</sup>C NMR spectrum of C<sub>18</sub>-PEG<sub>10</sub>-Br in CDCl<sub>3</sub>

**Figure S6** <sup>1</sup>H NMR spectra of C<sub>18</sub>-PEG<sub>20</sub>-Br and C<sub>18</sub>-PEG<sub>100</sub>-Br in CDCl<sub>3</sub>

**Figure S7** <sup>1</sup>H NMR spectra of C<sub>18</sub>-PEG<sub>20</sub>-PNIPAAm and C<sub>18</sub>-PEG<sub>100</sub>-PNIPAAm in CDCl<sub>3</sub>

**Figure S8** <sup>1</sup>H NMR spectra of C<sub>18</sub>-PEG<sub>10</sub>-PNIPAAm, C<sub>18</sub>-PEG<sub>20</sub>-PNIPAAm and C<sub>18</sub>-PEG<sub>100</sub>-PNIPAAm in D<sub>2</sub>O (25°C)

NMR spectra were recorded using a Bruker AVANCE DPX 300 MHz spectrometer (300 MHz for <sup>1</sup>H and 75 MHz for <sup>13</sup>C). CDCl<sub>3</sub> was used as the solvent and TMS was selected as the reference standard. The D<sub>2</sub>O singlet at 4.70 ppm was selected as reference standard when the samples were measured in heavy water. Spectral features are tabulated in the following order: chemical shift (ppm); multiplicity (s – singlet, d – doublet, t – triplet, m – complex multiple).

## Electronic supplementary materials

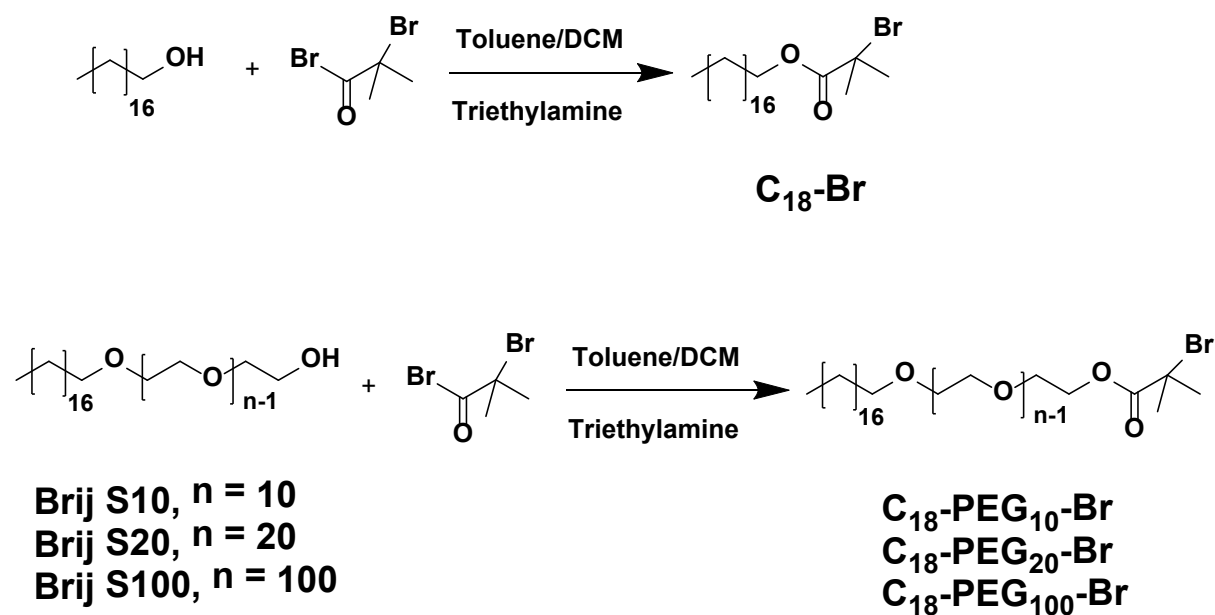

**Figure S1** Synthesis of C<sub>18</sub>-Br and C<sub>18</sub>-PEG-Br initiator

### Synthesis of the octadecyl initiator (C<sub>18</sub>-Br) and octadecyl-capped poly(ethylene glycol) initiator (C<sub>18</sub>-PEG<sub>n</sub>-Br, n = 10, 20 and 100)

The octadecyl-capped initiator (C<sub>18</sub>-Br) and octadecyl-capped-PEG macroinitiators (C<sub>18</sub>-PEG-Br) were prepared by reacting octadecanol (C<sub>18</sub>-OH) or poly(ethylene glycol) octadecyl ether (C<sub>18</sub>-PEG-OH) with 2-bromoisobutyl bromide in the presence of triethylamine.<sup>1,2,3</sup> The <sup>1</sup>H-NMR spectra indicated that the degree of esterification was at least 99 %.

**Octadecyl 2-bromoisobutyrate (C<sub>18</sub>-Br):** <sup>1</sup>H NMR (300MHz, CDCl<sub>3</sub>): δ = 0.88 (t, 3H, CH<sub>3</sub>-CH<sub>2</sub>-), 1.26 (m, 30H, -(CH<sub>2</sub>)<sub>15</sub>-), 1.66 (m, 2H, CH<sub>3</sub>(CH<sub>2</sub>)<sub>15</sub>CH<sub>2</sub>CH<sub>2</sub>O-), 1.95(s, 6H, -COC(CH<sub>3</sub>)<sub>2</sub>Br), 4.16 (t, 2H, CH<sub>3</sub>(CH<sub>2</sub>)<sub>16</sub>CH<sub>2</sub>O-);

<sup>13</sup>C NMR (75MHz, CDCl<sub>3</sub>): δ = 172 (C=O), 66(-OCH<sub>2</sub>(CH<sub>2</sub>)<sub>16</sub>CH<sub>3</sub>), 56(-C(CH<sub>3</sub>)<sub>2</sub> Br), 32 (-C(CH<sub>3</sub>)<sub>2</sub>Br), 23-31 (-OCH<sub>2</sub>(CH<sub>2</sub>)<sub>16</sub>CH<sub>3</sub>), 14(-O(CH<sub>2</sub>)<sub>17</sub>CH<sub>3</sub>).

## Electronic supplementary materials

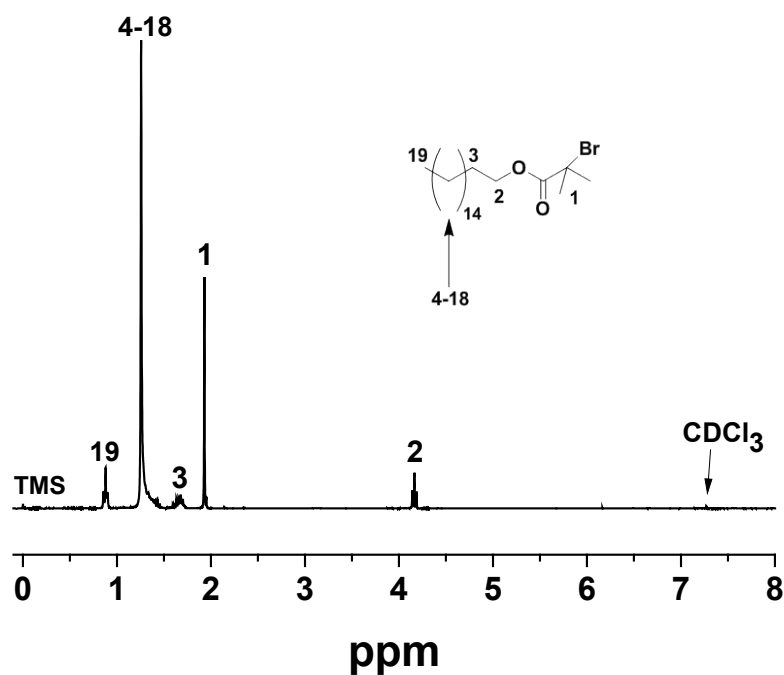

Figure S2  $^1\text{H}$  NMR spectrum of  $\text{C}_{18}\text{-Br}$  in  $\text{CDCl}_3$

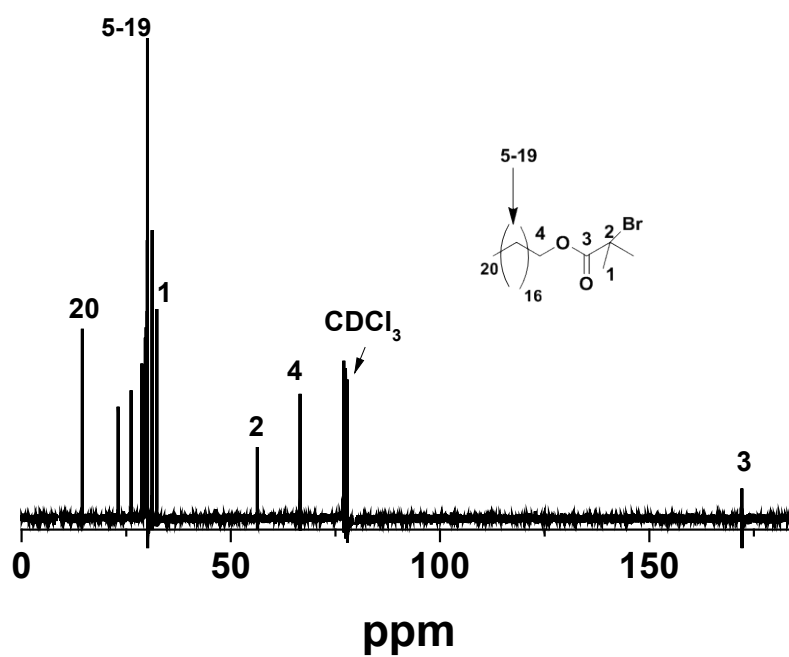

Figure S3  $^{13}\text{C}$  NMR spectrum of  $\text{C}_{18}\text{-Br}$  in  $\text{CDCl}_3$

## Electronic supplementary materials

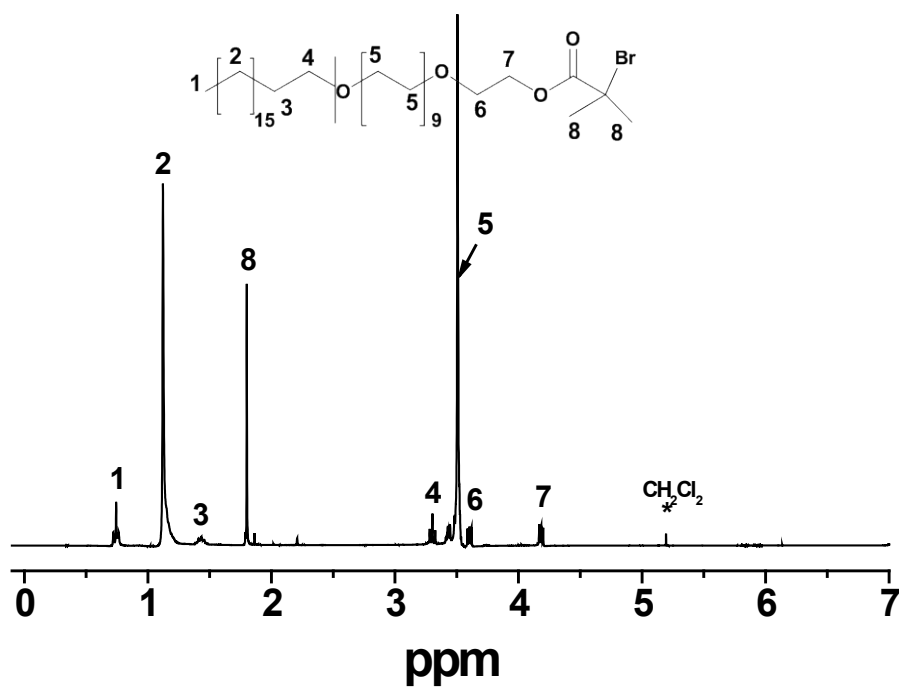

Figure S4  $^1\text{H}$  NMR spectrum of  $\text{C}_{18}\text{-PEG}_{10}\text{-Br}$  in  $\text{CDCl}_3$

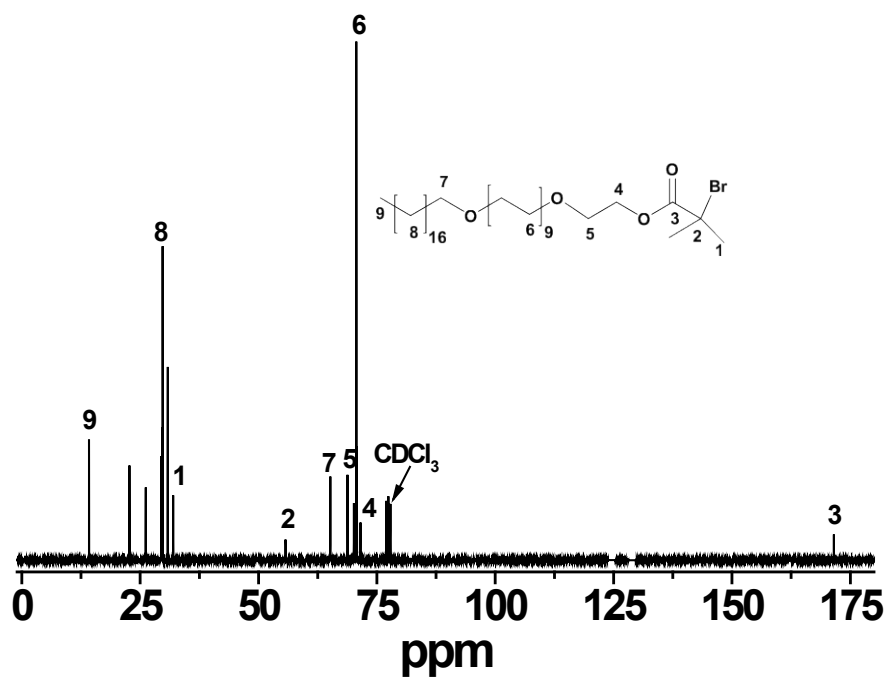

Figure S5  $^{13}\text{C}$  NMR spectrum of  $\text{C}_{18}\text{-PEG}_{10}\text{-Br}$  in  $\text{CDCl}_3$

## Electronic supplementary materials

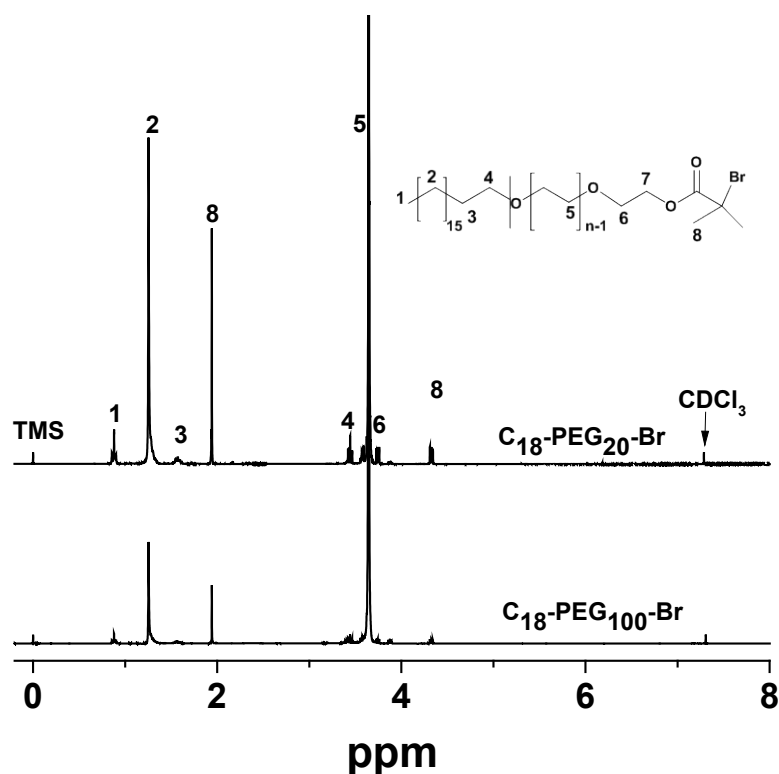

**Figure S6**  $^1\text{H}$  NMR spectrum of  $\text{C}_{18}\text{-PEG}_{20}\text{-Br}$  and  $\text{C}_{18}\text{-PEG}_{100}\text{-Br}$  in  $\text{CDCl}_3$

### Poly(ethylene glycol) methyl ether 2-bromoisobutyrate ( $\text{C}_{18}\text{-PEG}_{10}\text{-Br}$ )

$^1\text{H}$  NMR (300MHz,  $\text{CDCl}_3$ ):  $\delta = 0.72$  (t, 3H,  $\text{CH}_3\text{-CH}_2\text{-}$ ), 1.12 (m, 30H,  $\text{-(CH}_2\text{)}_{15}\text{-}$ ), 1.43 (m, 2H,  $\text{CH}_3(\text{CH}_2)_{15}\text{CH}_2\text{CH}_2\text{O-}$ ), 1.8 (s,  $\text{-COC(CH}_3\text{)}_2\text{ Br}$ ), 3.3 (m, 2H,  $\text{CH}_3(\text{CH}_2)_{16}\text{CH}_2\text{O-}$ ), 3.50 (m, 36H,  $\text{-O-(CH}_2\text{CH}_2\text{)}_9\text{-O-CH}_2\text{CH}_2\text{O-}$ ), 3.58 (m, 2H,  $\text{-O-(CH}_2\text{CH}_2\text{)}_9\text{-O-CH}_2\text{CH}_2\text{O-}$ ), 4.16 (m, 2H,  $\text{-O-(CH}_2\text{CH}_2\text{)}_9\text{-O-CH}_2\text{CH}_2\text{O-}$ );

$^{13}\text{C}$  NMR (75MHz,  $\text{CDCl}_3$ ):  $\delta = 171$  ( $\text{C=O}$ ), 71-66 ( $\text{-O-(CH}_2\text{CH}_2\text{)}_n\text{-O}$ ), 65 ( $\text{-OCH}_2(\text{CH}_2)_{16}\text{CH}_3$ ), 56 ( $\text{-C(CH}_3\text{)}_2\text{ Br}$ ), 32 ( $\text{-C(CH}_3\text{)}_2\text{ Br}$ ), 22-30 ( $\text{-OCH}_2(\text{CH}_2)_{16}\text{CH}_3$ ), 14 ( $\text{-O(CH}_2\text{)}_{17}\text{CH}_3$ ).

### Poly(ethylene glycol) methyl ether 2-bromoisobutyrate ( $\text{C}_{18}\text{-PEG}_{20}\text{-Br}$ ):

## Electronic supplementary materials

$^1\text{H}$  NMR (300MHz,  $\text{CDCl}_3$ ):  $\delta$  = 0.88 (t, 3H,  $\text{CH}_3\text{-CH}_2\text{-}$ ), 1.26 (m, 30H,  $\text{-(CH}_2\text{)}_{15}\text{-}$ ), 1.57 (m, 2H,  $\text{CH}_3(\text{CH}_2)_{15}\text{CH}_2\text{CH}_2\text{O-}$ ), 1.94(s,  $\text{-COC(CH}_3\text{)}_2\text{ Br}$ ), 3.42 (m, 2H,  $\text{CH}_3(\text{CH}_2)_{16}\text{CH}_2\text{O-}$ ), 3.57 (m, 76H,  $\text{-O-(CH}_2\text{CH}_2\text{)}_{19}\text{-O-CH}_2\text{CH}_2\text{O-}$ ), 3.72 (m, 2H,  $\text{-O-(CH}_2\text{CH}_2\text{)}_{19}\text{-O-CH}_2\text{CH}_2\text{O-}$ ), 4.34 (m, 2H,  $\text{-O-(CH}_2\text{CH}_2\text{)}_{19}\text{-O-CH}_2\text{CH}_2\text{O-}$ );

$^{13}\text{C}$  NMR (75MHz,  $\text{CDCl}_3$ ):  $\delta$  = 172 ( $\text{C=O}$ ), 72-69 ( $\text{-O-(CH}_2\text{CH}_2\text{)}_n\text{-O}$ ), 65( $\text{-OCH}_2(\text{CH}_2)_{16}\text{CH}_3$ ), 56( $\text{-C(CH}_3\text{)}_2\text{Br}$ ), 32( $\text{-C(CH}_3\text{)}_2\text{Br}$ ), 23-31( $\text{-OCH}_2(\text{CH}_2)_{16}\text{CH}_3$ ), 14 ( $\text{O(CH}_2\text{)}_{17}\text{CH}_3$ ).

### Poly(ethylene glycol) methyl ether 2-bromoisobutyrate ( $\text{C}_{18}\text{-PEG}_{100}\text{-Br}$ ):

$^1\text{H}$  NMR (300MHz,  $\text{CDCl}_3$ ):  $\delta$  = 0.88 (t, 3H,  $\text{CH}_3\text{-CH}_2\text{-}$ ), 1.27 (m, 30H,  $\text{-(CH}_2\text{)}_{15}\text{-}$ ), 1.58 (m, 2H,  $\text{CH}_3(\text{CH}_2)_{15}\text{CH}_2\text{CH}_2\text{O-}$ ), 1.95 (s,  $\text{-COC(CH}_3\text{)}_2\text{ Br}$ ), 3.44 (m, 2H,  $\text{CH}_3(\text{CH}_2)_{16}\text{CH}_2\text{O-}$ ), 3.58 (m, 396H,  $\text{-O-(CH}_2\text{CH}_2\text{)}_{99}\text{-O-CH}_2\text{CH}_2\text{O-}$ ), 3.73 (m, 2H,  $\text{-O-(CH}_2\text{CH}_2\text{)}_{99}\text{-O-CH}_2\text{CH}_2\text{O-}$ ), 4.34 (m, 2H,  $\text{-O-(CH}_2\text{CH}_2\text{)}_{99}\text{-O-CH}_2\text{CH}_2\text{O-}$ );

$^{13}\text{C}$  NMR (75MHz,  $\text{CDCl}_3$ ):  $\delta$  = 172 ( $\text{C=O}$ ), 71-66 ( $\text{-O-(CH}_2\text{CH}_2\text{)}_n\text{-O}$ ), 65( $\text{-OCH}_2(\text{CH}_2)_{16}\text{CH}_3$ ), 56 ( $\text{-C(CH}_3\text{)}_2\text{Br}$ ), 32( $\text{-C(CH}_3\text{)}_2\text{Br}$ ), 22-30( $\text{-OCH}_2(\text{CH}_2)_{16}\text{CH}_3$ ), 14 ( $\text{O(CH}_2\text{)}_{17}\text{CH}_3$ ).

The numbers of repeating units of the ethylene glycol (EG) in the PEG polymers were recalculated according to their proton NMR spectra of the fully esterification products, based on a simple formula:  $n = (3I_a/2I_b)$ , where  $I_a$  is the corresponding integral area of the methenyl group of EG ( $\text{-O-CH}_2\text{CH}_2\text{-}$ ) at 3.7 ppm and  $I_b$  is the integral area of the end-capped methyl group ( $\text{-C(CH}_3\text{)}_2\text{Br}$ , 6H) at 1.9 ppm. The number of repeating units of EG were estimated to be 10 for Brij®S10, 20 for Brij®S20 and 100 for Brij®S100, and they are designated  $\text{C}_{18}\text{-PEG}_{10}$ ,  $\text{C}_{18}\text{-PEG}_{20}$  and  $\text{C}_{18}\text{-PEG}_{100}$ , respectively.<sup>2,3</sup>

## Electronic supplementary materials

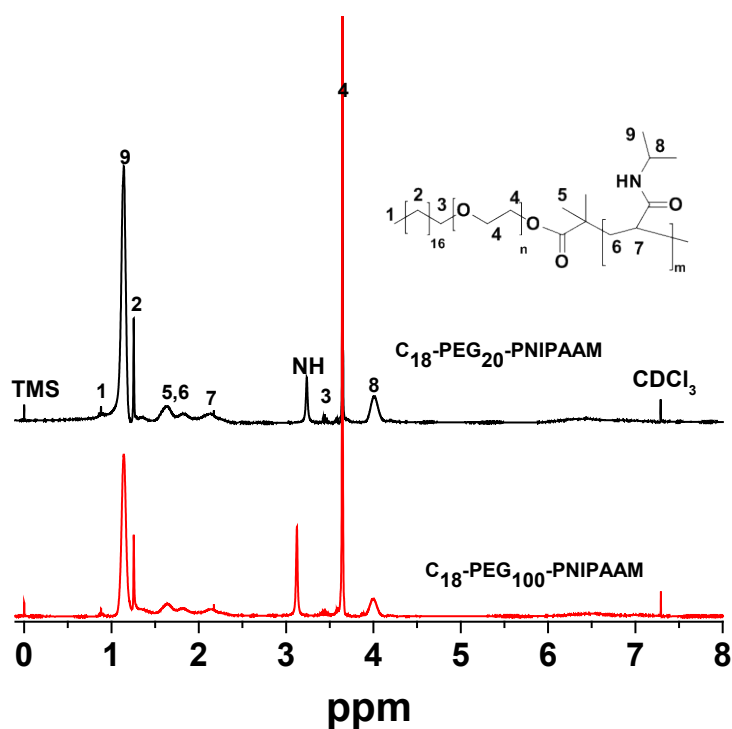

**Figure S7**  $^1\text{H}$  NMR spectrum of  $\text{C}_{18}\text{-PEG}_{20}\text{-PNIPAAm}$  and  $\text{C}_{18}\text{-PEG}_{100}\text{-PNIPAAm}$  in  $\text{CDCl}_3$

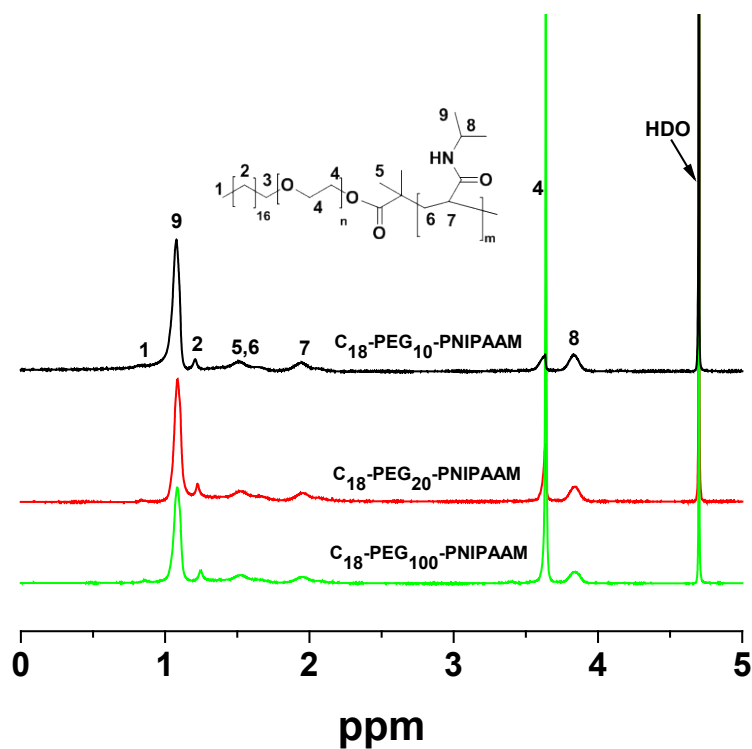

## Electronic supplementary materials

**Figure S8**  $^1\text{H}$  NMR spectra of  $\text{C}_{18}\text{-PEG}_{10}\text{-PNIPAAM}$ ,  $\text{C}_{18}\text{-PEG}_{20}\text{-PNIPAAM}$  and  $\text{C}_{18}\text{-PEG}_{100}\text{-PNIPAAM}$  in  $\text{D}_2\text{O}$  ( $25^\circ\text{C}$ )

### References:

- 1 S. Liu and S. P. Armes, *J. Am. Chem. Soc.*, 2001, **123**, 9910.
- 2 N. Beheshti, K. Zhu, A.-L. Kjøniksen, K. D. Knudsen, and B. Nyström, *Soft Matter*, 2011, **7**, 8111.
- 3 W. Wang, H. Mauroy, K. Zhu, K. D. Knudsen, A.-L. Kjøniksen, B. Nyström and S. A. Sande, *Soft Matter*, 2012, **8**, 11514
